# Supplementary material for: RNA-Seq of Human Neurons Derived from iPS Cells Reveals Candidate Long Non-Coding RNAs Involved in Neurogenesis and Neuropsychiatric Disorders
Source: PLoS One. 2011 Sep 7;6(9):e23356. doi: 10.1371/journal.pone.0023356 (PMC3168439; doi:10.1371/journal.pone.0023356)
Supplement: Table S3 — Top coding genes: absolute expression in iPSCs, day 10 neurons, and fold increase and decrease. (XLS) [file pone.0023356.s004.xls]

## Sheet: Sheet1
Top 15 protein coding genes expressed in iPSCs (day 0)
Gene Symbols	Position	Day_0_FPKM	Day_10_FPKM	ln (fold-change)	p-value
TPT1	chr13:45911007-45915347	36993.2	19285.7	-0.651367	0
PTMA	chr2:232571604-232578251	22605.7	4861.69	-1.53682	0
NCL	chr2:232318241-232348352	22453	6468.46	-1.24448	0
NASP	chr1:46049517-46084566	20402.6	4709.53	-1.46607	0
HSP90AB1	chr6:44214823-44221620	15976.5	4015.08	-1.38106	0
NPM1	chr5:170814119-170838141	14825.1	3230.43	-1.52371	0
HNRNPA2B1	chr7:26229546-26252976	14790.5	7122.95	-0.730666	0
TUBA1B	chr12:49521568-49525304	12829.5	7801.03	-0.497491	0
RPS6	chr9:19375712-19380252	12790.9	6235.38	-0.718498	0
DEK	chr6:18224098-18265054	12474.2	4771.83	-0.960929	0
RPL35A	chr3:197615945-197687013	11186.1	5162.98	-0.773162	0
CANX	chr5:179105583-179157926	10568.6	5419.55	-0.667878	0
PABPC1	chr8:101698043-101735037	10466.7	3216.71	-1.17984	0
EEF1A1	chr6:74225472-74231623	10358	4873.1	-0.754032	0
PPIA	chr7:44836278-44864163	9939.15	4662.32	-0.756969	0
Top 15 protein coding genes expressed in day 10 neurons
Gene symbols	Position	Day_0_FPKM	Day_10_FPKM	ln (fold-change)	p-value
TPT1	chr13:45911007-45915347	36993.2	19285.7	-0.651367	0
TUBA1B	chr12:49521568-49525304	12829.5	7801.03	-0.497491	0
HNRNPA2B1	chr7:26229546-26252976	14790.5	7122.95	-0.730666	0
C5orf13	chr5:110831730-111353006	3251.78	6888.65	0.750672	0
NCL	chr2:232318241-232348352	22453	6468.46	-1.24448	0
RPS6	chr9:19375712-19380252	12790.9	6235.38	-0.718498	0
CANX	chr5:179105583-179157926	10568.6	5419.55	-0.667878	0
RPL35A	chr3:197615945-197687013	11186.1	5162.98	-0.773162	0
ACTB	chr7:5566781-5570340	9371.13	5108.15	-0.606796	0
HNRNPD	chr4:83273650-83295144	9710.35	5095.53	-0.644828	0
HNRNPH1	chr5:179041178-179061474	6791.05	5036.49	-0.298896	0
C2orf61,CALM2	chr2:47126413-47403740	4725.44	4973.99	0.0512606	0.00895695
EEF1A1	chr6:74225472-74231623	10358	4873.1	-0.754032	0
PTMA	chr2:232571604-232578251	22605.7	4861.69	-1.53682	0
DEK	chr6:18224098-18265054	12474.2	4771.83	-0.960929	0
Top 20 fold decrease with FPKM > 100 for day 0
Gene Symbols	Position	Day_0_FPKM	Day_10_FPKM	ln (fold-change)	p-value
SCGB3A2	chr5:147250244-147286101	1295.61	0	-1.79769e+308	0
POU5F1	chr6:31132113-31138470	884.639	0	-1.79769e+308	0
DMKN	chr19:35988121-36004560	335.101	0	-1.79769e+308	0
C14orf115	chr14:74815165-74826708	261.921	0	-1.79769e+308	0
PRDM14	chr8:70963885-70983928	228.876	0	-1.79769e+308	0
HLA-DPB2	chr6:33080227-33111102	207.12	0	-1.79769e+308	0
POU5F1P1	chr8:128302061-128494384	124.928	0	-1.79769e+308	0
TRIML2	chr4:189012426-189030757	113.438	0	-1.79769e+308	0
MT1F	chr16:56672577-56878862	110.564	0	-1.79769e+308	0
MT1X	chr16:56672577-56878862	108.59	0	-1.79769e+308	0
CYP2S1	chr19:41699114-41713443	107.127	0	-1.79769e+308	0
IDO1	chr8:39759793-39873910	100.637	0	-1.79769e+308	0
FZD5	chr2:208627309-208634287	423.968	1.39331	-5.71797	1.60192e-11
VWDE	chr7:12370510-12443567	158.301	1.06096	-5.00532	2.82308e-07
CLDN6	chr16:3064712-3070072	426.496	3.03718	-4.94467	0
L1TD1,Y_RNA	chr1:62660502-62678000	6295.21	50.7704	-4.82023	0
ZFP42	chr4:188916924-188926204	201.752	1.67512	-4.79116	6.60536e-10
PMAIP1	chr18:57567179-57571538	378.588	3.9504	-4.56263	0
OTX2	chr14:57267425-57277187	485.786	7.65588	-4.1503	0
ZNF208	chr19:22148896-22193745	316.924	5.00678	-4.14787	0
Top 20 fold increase with FPKM >100 for day 10
Gene Symbols	Position	Day_0_FPKM	Day_10_FPKM	ln (fold-change)	p-value
CARTPT	chr5:71014989-71016875	0	570.286	1.79769e+308	0
STMN4	chr8:27092839-27115937	0	347.193	1.79769e+308	0
GRIA2	chr4:158125333-158287227	0	330.885	1.79769e+308	0
HMP19	chr5:173472606-173670504	0	122.544	1.79769e+308	0
HOXB2	chr17:46618255-46683776	0	120.583	1.79769e+308	0
ZIC4	chr3:147103832-147228080	0	117.702	1.79769e+308	0
ST18	chr8:53023398-53373519	0	115.293	1.79769e+308	0
HOXC10,HOXC4,HOXC5,HOXC6,HOXC9	chr12:54377233-54449814	0	113.983	1.79769e+308	0
STMN2	chr8:80523048-80578397	3.99353	2962.58	6.60914	7.33005e-05
SCN3A	chr2:165848493-166060577	0.196609	125.82	6.46139	0
MYT1L	chr2:1792884-2335045	0.333417	105.079	5.75307	2.9513e-07
EBF2	chr8:25699245-25902913	0.396854	121.168	5.72136	0
NHLH1	chr1:160336856-160342638	1.38232	329.88	5.47497	2.10233e-07
GNG3	chr11:62457746-62477317	0.969	185.087	5.25232	1.92096e-07
NTRK2	chr9:87283465-87638505	1.32699	244.593	5.21668	0
AKAP6	chr14:32798478-33300567	1.06505	182.12	5.14164	0
EPHA3	chr3:89156673-89531284	0.987973	150.814	5.02815	1.02144e-05
KCNK2	chr1:215179117-215410436	0.691279	102.168	4.99583	6.44722e-07
DCC	chr18:49867157-51062269	2.30786	336.775	4.9831	3.06771e-07
SYT4	chr18:40847858-40857615	3.00754	436.137	4.97683	2.27338e-06
Other notable protein coding genes discussed in paper			(all differences between day 0 and 10 statistically sig. unless marked by*)
Gene Symbols	Position	Day_0_FPKM	Day_10_FPKM	ln (fold-change)	p-value
ASCL1	chr12:103351451-103354287	0	71.6028	1.79769e+308	0*
HOXB9	chr17:46684604-46724385	0	86.0277	1.79769e+308	0
HOXA10,HOXA9,hsa-mir-196b	chr7:27202056-27219880	0	74.6121	1.79769e+308	0
HOXA3,HOXA4,HOXA6	chr7:27145808-27197555	0	72.7855	1.79769e+308	0
HOXB8	chr17:46684604-46724385	0	56.7338	1.79769e+308	1.03473e-13
HOXB5	chr17:46618255-46683776	0	37.1297	1.79769e+308	2.06041e-09
HOXB6	chr17:46618255-46683776	0	27.2284	1.79769e+308	2.48313e-08
HOXA5	chr7:27145808-27197555	0	12.9594	1.79769e+308	1.87882e-05
ZNF804A	chr2:185463092-185804219	0	9.05134	1.79769e+308	0
CHL1	chr3:237440-451090	0	45.2766	1.79769e+308	0
SLC17a6	chr11:22359666-22401044	0.78379	100.315	4.85193	1.87882e-05
HOXB3,HOXB4	chr17:46618255-46683776	0.735576	75.6224	4.63285	1.42745e-06
SEMA3C	chr7:80371853-80551675	1.78699	145.501	4.39965	5.20824e-09
HOXA2	chr7:27139972-27142148	1.79991	140.993	4.36097	1.27439e-05
RFX4	chr12:106976684-107156581	3.38782	230.285	4.21913	1.31006e-14
PLXNA2	chr1:208195586-208417665	1.30127	76.6131	4.07543	4.12207e-06
NPAS3	chr14:33408448-34273382	1.94679	80.7309	3.72494	2.9335e-07
MEF2C	chr5:87803362-88762215	2.92197	118.704	3.70438	0
ST8SIA1,U1	chr12:22346327-22487648	1.51729	61.2076	3.69735	1.39296e-05
PCDH9	chr13:66876968-67804463	4.25959	156.02	3.60081	2.89768e-13
NCAM1	chr11:113003649-113149133	26.6506	673.376	3.22949	0
ZIC1	chr3:147103832-147228080	31.4129	696.719	3.09916	0
CERKL,NEUROD1	chr2:182401398-182545603	3.38347	29.6245	2.1697	0.000157138
NLGN1	chr3:173114073-174004434	14.7421	62.2452	1.44038	8.90217e-07
AC011754.1,AC096753.1,CTNNA2	chr2:79384131-80875905	22.8788	79.6102	1.24693	4.26112e-11
NRXN3	chr14:79081274-80330758	20.5994	66.2724	1.16851	3.75578e-06
NRXN1	chr2:50145642-51259674	121.01	240.108	0.685216	5.31764e-10
SMARCA2	chr9:2015341-2193624	30.456	51.8035	0.531176	0.0203633
HLA-DPA3	chr6:33080227-33111102	53.4046	0	-1.79769e+308	0
JARID2	chr6:15246526-15522253	952.534	99.1017	-2.26298	0
LIN28A	chr1:26737268-26756213	8758.94	594.517	-2.69008	0
NANOG	chr12:7941994-7948655	98.3536	4.42389	-3.10155	1.75289e-10
