# Supplementary material for: RNA-Seq of Human Neurons Derived from iPS Cells Reveals Candidate Long Non-Coding RNAs Involved in Neurogenesis and Neuropsychiatric Disorders
Source: PLoS One. 2011 Sep 7;6(9):e23356. doi: 10.1371/journal.pone.0023356 (PMC3168439; doi:10.1371/journal.pone.0023356)
Supplement: Table S4 — Top lincRNAs. (XLS) [file pone.0023356.s005.xls]

## Sheet: Sheet1
Top 15 lincRNAs expressed in iPSCs (day 0)
Gene Symbols	Position	Day_0_FPKM	Day_10_FPKM	ln (fold-change)	p-value
MALAT1	chr11:65269806-65271080	18327.6	20483.1	0.111191	0
AL593851.1	chr9:135894809-135896553	3149.88	1596.37	-0.679631	0
AC010627.1	chr5:14651754-14653492	1520.98	649.571	-0.8508	0
AC012379.1	chr15:49115931-49255641	957.812	1186.24	0.213892	6.48598e-08
SNHG6,SNORD87	chr8:67782983-67838633	739.735	481.894	-0.428568	1.71902e-10
AL050329.1	chr6:64345724-66417118	420.271	183.278	-0.829897	0
AL445670.1	chr9:99883187-99893292	358.673	8.69449	-3.71972	0
AC073150.1	chr7:27495995-27499365	357.582	118.705	-1.10272	0
AC092490.1	chr12:8931626-8935681	321.73	210.239	-0.425469	6.90083e-06
AC006144.1	chrX:120181437-120183794	270.625	153.421	-0.56755	1.53745e-08
AC006427.1	chr4:16162127-16259810	237.697	99.658	-0.869252	0
AL513497.1	chr1:28832491-28865607	233.041	34.0147	-1.92442	0
AC092490.2	chr12:8850517-8931191	198.993	125.224	-0.463161	0
AP001767.1	chr11:82783118-82784640	183.915	235.354	0.246613	0.012219
AL596114.1	chr13:30083546-30169721	164.974	85.2173	-0.660581	9.00065e-09
Top 15 lincRNAs expressed in day 10 neurons
Gene Symbols	Position	Day_0_FPKM	Day_10_FPKM	ln (fold-change)	p-value
MALAT1	chr11:65269806-65271080	18327.6	20483.1	0.111191	0
AL593851.1	chr9:135894809-135896553	3149.88	1596.37	-0.679631	0
AC012379.1	chr15:49115931-49255641	957.812	1186.24	0.213892	6.48598e-08
AC010627.1	chr5:14651754-14653492	1520.98	649.571	-0.8508	0
SNHG6,SNORD87	chr8:67782983-67838633	739.735	481.894	-0.428568	1.71902e-10
CRNDE	chr16:54952797-54962708	112.685	411.194	1.29447	0
AP000944.1	chr11:65190244-65193996	121.694	254.579	0.738101	2.36346e-11
AP001767.1	chr11:82783118-82784640	183.915	235.354	0.246613	0.012219
AC092490.1	chr12:8931626-8935681	321.73	210.239	-0.425469	6.90083e-06
AL050329.1	chr6:64345724-66417118	420.271	183.278	-0.829897	0
AC006144.1	chrX:120181437-120183794	270.625	153.421	-0.56755	1.53745e-08
AC092490.2	chr12:8850517-8931191	198.993	125.224	-0.463161	0
AC018557.1	chr16:66754795-66788643	87.752	119.001	0.304614	2.28911e-06
AC073150.1	chr7:27495995-27499365	357.582	118.705	-1.10272	0
AC005837.3	chr17:74730198-74733413	147.424	116.533	-0.235137	1.17415e-11
Top 15 fold decrease with FPKM >50
Gene Symbols	Position	Day_0_FPKM	Day_10_FPKM	ln (fold-change)	p-value
AC007686.1	chr14:77490887-77495034	50.2107	0.318469	-5.06046	0
AL445670.1	chr9:99883187-99893292	358.673	8.69449	-3.71972	0
RP11-68L18.1	chr8:91634222-91997485	114.064	5.46306	-3.03875	0
AC011370.1	chr5:146939556-147162338	83.8241	5.41648	-2.73927	0
AC021231.2	chr15:35375426-35450184	89.781	8.32967	-2.37755	0
AC087854.1	chr8:22224761-22291642	99.1007	10.2319	-2.27062	0
PVT1,hsa-mir-1204	chr8:128806778-129113499	107.623	14.2162	-2.02425	107.623
AL513497.1	chr1:28832491-28865607	233.041	34.0147	-1.92442	0
AC010615.3	chr19:21665938-21685703	88.6809	18.6786	-1.55767	1.08675e-09
RP11-11N9.4	chr8:32853695-32902373	104.915	33.715	-1.13521	3.89409e-11
AC073150.1	chr7:27495995-27499365	357.582	118.705	-1.10272	0
RP11-205M5.3	chr8:37716135-37757003	54.0606	8.88131	-1.80616	4.75175e-14
Z71183.1	chr22:32896546-32907788	97.2911	24.6644	-1.37235	1.1473e-09
AL731576.1	chr10:75757871-75879918	74.0718	18.7243	-1.37521	0
AC137932.2	chr16:89334034-89556969	72.3343	20.0594	-1.2826	0
AC015813.2	chr17:56066404-56072211	161.39	43.7322	-1.30574	1.86517e-14
Top 15 fold increase with FPKM >50
Gene Symbols	Position	Day_0_FPKM	Day_10_FPKM	ln (fold-change)	p-value
AC015959.1	chr18:43914186-44040783	10.5311	59.2001	1.72659	2.02749e-11
C14orf132	chr14:96505661-96560133	15.2672	84.7828	1.71439	6.98507e-10
AL157931.1	chr13:23429411-23493348	4.71906	25.3762	1.6822	0.000370507
AC008403.1	chr19:48972288-48985571	15.5312	68.2473	1.48029	0
CRNDE	chr16:54952797-54962708	112.685	411.194	1.29447	0
CTC-340A15.2	chr5:163723701-164598649	16.487	53.2028	1.17154	0.000201542
AC112504.1	chr3:141655548-141868386	32.7354	84.5984	0.949457	0
AL358933.2	chr6:28089572-28105071	21.2626	52.5506	0.904827	3.55207e-10
AC087284.2	chr15:90544623-90625439	22.2496	52.7698	0.863615	7.70903e-06
AP000944.1	chr11:65190244-65193996	121.694	254.579	0.738101	2.36346e-11
AL161729.1	chr9:98205261-98279339	30.0124	55.1575	0.608583	0
RP11-37B2.1	chr8:90621628-90769955	76.0261	113.763	0.403042	0.0095828
AC018557.1	chr16:66754795-66788643	87.752	119.001	0.304614	2.28911e-06
AC008865.2	chr5:96149730-96373219	77.5992	104.476	0.2974	0.00272098
AP001767.1	chr11:82783118-82784640	183.915	235.354	0.246613	0.012219
