# Supplementary material for: RNA-Seq of Human Neurons Derived from iPS Cells Reveals Candidate Long Non-Coding RNAs Involved in Neurogenesis and Neuropsychiatric Disorders
Source: PLoS One. 2011 Sep 7;6(9):e23356. doi: 10.1371/journal.pone.0023356 (PMC3168439; doi:10.1371/journal.pone.0023356)
Supplement: Table S7 — Differentially expressed genes that map to genome wide association (GWAS) SNPs and copy number variants (CNVs) found in schizophrenia, bipolar disorder and autism spectrum disorders. (XLS) [file pone.0023356.s008.xls]

## Sheet: Sheet1
	Anney GWAS ASD
SNP	SNP pos.	Diff. exp gene	Gene position	FPKM day 0	FPKM day 10	uncorrected P	gene type
rs4773918	96237760	CLDN10	chr13:96085857-96296957	25.7328	0.368518	0	protein-coding
rs6079536	14696856	RPS10P2	chr20:13829892-16033842	7.55755	0	0	pseudogene
rs4141463	14747445	RPS10P2	chr20:13829892-16033842	7.55755	0	0	pseudogene
rs9532931	42400053	RP11-12I24.2	chr13:42140960-42535256	5.30119	1.73259	4.44089e-16	pseudogene
rs3784730	92987154	ST8SIA2	chr15:92937057-93011958	2.40666	30.3722	0.000153116	protein coding
	Weiss GWAS ASD
rs13208655	15257713	JARID2	chr6:15246526-15522253	952.534	99.1017	0	protein coding
rs7923367	69171827	RP11-344A5.1	chr10:67679718-69455927	4.57323	0	-1.79769e+308	processed transcript
	WTCCC BD
													CTNNA3 in addiction
rs10210302	234158813	SCARNA6	chr2:234118696-234204320	11.3622	8.55693	5.96237e-06	snoRNA
rs1333049	22125502	UBA52P6	chr9:21802634-22121096	50.9402	16.9269	0	pseudogene
		CDKN2B	chr9:21802634-22121096	1.23164	0	0	protein_coding
rs2542151	12779947	CEP76	chr18:12672630-12725739	50.3459	21.5464	6.39573e-05	protein_coding
		PTPN2	chr18:12785476-12884337	176.952	58.6083	6.25056e-13	protein_coding
	SZ database
rs10761482	62085336	RP11-388P9.2	chr10:61788158-62493248	3.91409	6.19535	0	processed_transcript
		ARL4P	chr10:61788158-62493248	12.518	0	0	pseudogene
rs7045881	26935996	IFT74	chr9:26904080-27062928	226.185	152.461	3.86114e-08	protein_coding
rs13194053	27143882	HIST1H4I	chr6:27105007-27114631	57.3242	24.7836	3.90572e-08	protein_coding
rs3130375	1833716	AL158139.1	chr6:1624040-2245915	2.26068	0	0	lincRNA
rs893703	139250649	RP11-319G6.1	chr3:139108656-139396859	24.0657	83.474	0	processed_transcript
		ACTG1P1	chr3:139108656-139396859	0	2.14122	0	pseudogene
rs28699412	1451382	IL3RA	chrX:1455508-1501581	1.45552	0	0
rs13211507	28257376	TAX1BP1	chr7:27773013-28281515	624.64	473.615	1.05501e-05	protein_coding
rs1344706	185778429	ZNF804A	chr2:185463092-185804219	0	9.05134	0	protein_coding
rs7192086	13061610	SHISA9	chr16:12995454-13329566	50.1934	11.8728		protein_coding
rs13211507	28257376	RP5-874C20.3	chr6:28234787-28245974	83.0533	133.861	0.000874769	pseudogene
	O'Donovan SZ GWAS and Follow up
rs1344706	185778429	ZNF804A	chr2:185463092-185804219	0	9.05134	0	protein_coding
rs7192086	13061585	SHISA9	chr16:12995454-13329566	50.1934	11.8728	6.23119e-05	protein_coding
rs8052792	53644219	AC007497.1	chr16:53633823-53737771	10.806	16.3181	0.000195417	lincRNA
	Scott BD GWAS
rs472913	61095532	KCNAB2	chr1:5922870-6161253	1.78318	14.3688	7.17348e-06	protein_coding
rs13409348	79539962	AC011754.1,AC096753.1,CTNNA2	chr2:79384131-80875905	22.8788	79.6102	4.26112e-11	processed_transcript
rs2537859	55482792	KIT	chr4:55524084-55606881	149.478	83.6751	5.67664e-05	protein_coding
rs2905072	135845061	AL445645.1	chr9:135766734-135820020	9.97838	15.6399	8.17205e-08	lincRNA
		EEF1AL3	chr9:135894809-135896553	12388.1	5918.8	0	pseudogene
rs2242663	66335338	RBM14,RBM4	chr11:66384052-66445275	1164.48	862.691	3.94129e-13	protein_coding
rs1035050	47563986	RP11-1079K10.4	chr17:47481413-47492246	19.524	1.21179	0	processed_transcript
	Wang GWAS Top hits SZ and BD
rs11164835	93379067	RP11-386I23.1	chr1:93307723-93427079	14.9707	5.98563	3.62521e-09	pseudogene
rs10496702	134005543	AC016909.1	chr2:133429372-134326034	0	13.6247	0	processed_transcript
rs7600871	134014935	AC010890.1	chr2:133429372-134326034	0	3.60072	0	processed_transcript
rs12527359	89728195	RP11-586K2.1	chr8:89044236-89749363	19.0901	71.4762	0	processed_transcript
rs12201676	89732075	AC037450.1,MMP16	chr8:89044236-89749363	212.35	123.485	6.66663e-06	pseudogene
rs802524	145951616	AC092676.3	chr7:145813452-148118090	21.6368	0	0	pseudogene
rs2044117	101708336	RP11-430M15.1	chr13:101360578-102068843	0	0.426254	0	processed_transcript
		NALCN	chr13:101360578-102068843	0	7.42701	0	protein_coding
rs4813376	19851429	RIN2	chr20:19867164-19983101	5.12266	59.5269	1.0048e-07	protein_coding
rs10782945	93304272	SNORA66	chr1:93297596-93307481	124.807	0	0	snoRNA
	Wang GWAS ASD
rs3755827	62360345	C3orf14	chr3:61547242-62355005	26.2107	60.8795	0	protein_coding
rs807023	102770108	SEMA4G	chr10:102729214-102754158	1.79206	5.70995	1.03419e-11	protein_coding
		C10orf2	chr10:102729214-102754158	25.5315	3.71139	0	protein_coding
CNVs
15q13.3 del
Gene Symbols	Position	Day_0_FPKM	Day_10_FPKM	ln (fold-change)	p-value	Type of primary gene
ARHGAP11B	chr15:30918402-30977809	129.975	73.5784	-0.568989	9.61746e-05	protein_coding
CHRNA7	chr15:32322700-32464722	7.79046	23.4377	1.10145	0.0078231	protein_coding
ARHGAP11A	chr15:32907690-32932150	175.584	77.1241	-0.822701	1.71844e-09	protein_coding
SCG5	chr15:32933876-32989299	110.638	201.606	0.600053	3.94661e-07	protein_coding
16p11.2 dup
C16orf53,MVP	chr16:29827284-29859355	157.095	205.051	0.266408	0.0109055	protein_coding
INO80E	chr16:30004310-30022401	4.0476	0	-1.79769e+308	0	protein_coding
MAZ	chr16:29817854-29823178	189.484	143.798	-0.275893	0.0126106	protein_coding
C16orf53,MVP	chr16:29827284-29859355	157.095	205.051	0.266408	0.0109055	protein_coding
QPRT,SPN	chr16:29674299-29709325	114.874	21.47	-1.67718	1.7732e-11	protein_coding
22q11.2 del
MRPL40	chr22:19318220-19554330	63.1651	50.3742	-0.226274	1.38893e-07	protein_coding
AC000068.5	chr22:19318220-19554330	2.73849	2.2594	-0.19231	0.00867309	processed_transcript
CDC45	chr22:19318220-19554330	158.021	80.3523	-0.676307	0	protein_coding
SEPTIN5	chr22:19611790-19842462	2.18855	19.3337	2.17861	0	protein_coding
AC000089.3	chr22:19611790-19842462	3.66309	4.86032	0.282797	0.00656799	pseudogene
15q11.2 del
CYFIP1	chr15:22892662-23034408	123.897	74.8959	-0.503348	8.14318e-07	protein_coding
HERC2P3	chr15:20588367-20711433	14.3844	32.0028	0.799681	0.0209257	processed_transcript
NIPA2	chr15:22892662-23034408	201.543	85.4181	-0.858445	0	protein_coding
AC091565.3	chr15:23282344-23311039	39.2053	123.647	1.14862	3.68584e-10	protein_coding
3q29 del
AC069257.9	chr3:195938357-196014716	3.73502	5.76616	0.434253	3.6426e-11	protein_coding
FBXO45	chr3:196281055-196315930	89.4235	63.5453	-0.34163	0.0180924	protein_coding
LRRC33,PIGX	chr3:196366556-196462878	31.5202	72.7511	0.836415	1.14617e-05	protein_coding
PAK2	chr3:196466727-196559518	116.084	156.172	0.296644	0.0173541	protein_coding
AC127904.2	chr3:196594726-196661585	6.05788	0	-1.79769e+308	0	processed_transcript
TFRC	chr3:195776154-195809060	278.479	111.749	-0.913084	6.96332e-13	protein_coding
TCTEX1D2,TM4SF19	chr3:196018089-196065374	190.677	280.762	0.386927	3.92819e-05	protein_coding
RNF168	chr3:196195653-196230639	294.527	117.447	-0.919387	4.44089e-16	protein_coding
WDR53	chr3:196281055-196315930	288.53	118.561	-0.889373	0	protein_coding
C3orf34	chr3:196366556-196462878	7.14749	28.6113	1.38704	1.03622e-10	protein_coding
AC068302.1	chr3:196768364-197030618	6.0939	7.68248	0.231654	0.00474015	lincRNA
DLG1	chr3:196768364-197030618	282.42	206.927	-0.311032	0.000928623	protein_coding
AC024560.3	chr3:197305083-197354777	47.5349	91.0684	0.650147	0.00032112	processed_transcript
17q12 del
PIGW	chr17:34842478-34895150	25.0954	10.3414	-0.88653	1.21857e-06	protein_coding
AATF	chr17:35306174-35414170	249.424	116.965	-0.757278	1.40459e-11	protein_coding
RP11-19G24.2	chr17:35441922-36244363	17.1222	20.7174	0.190598	0	pseudogene
C17orf78	chr17:35441922-36244363	28.1509	22.2927	-0.233321	9.59285e-10	protein_coding
TADA2A	chr17:35441922-36244363	43.6891	37.7221	-0.146851	9.99374e-05	protein_coding
MYO19	chr17:34842478-34895150	29.0074	11.414	-0.93271	1.55976e-07	protein_coding
CTB-75G16.1	chr17:34900772-34946278	0	15.517	1.79769e+308	0	pseudogene
ACACA	chr17:35441922-36244363	179.317	114.591	-0.447786	4.41158e-08	protein_coding
AC068400.1	chr17:35441922-36244363	5.75666	2.29743	-0.918567	0	lincRNA
DDX52	chr17:35441922-36244363	170.96	113.614	-0.408622	2.18539e-11	protein_coding
HNF1B	chr17:35441922-36244363	1.7685	0	-1.79769e+308	0	protein_coding
1q21.1 del
RP11-325P15.3	chr1:146490894-146596107	0	0.376325	1.79769e+308	0	pseudogene
RP11-325P15.2	chr1:146490894-146596107	213.469	55.3446	-1.34991	0	pseudogene
PRKAB2	chr1:146626684-146644129	191.268	119.848	-0.467448	0.000366138	protein_coding
FMO5	chr1:146655884-146697230	1.83763	15.7629	2.14918	0	protein_coding
CCT8P1	chr1:146655884-146697230	299.245	97.7967	-1.11837	0	pseudogene
RP11-495P10.2	chr1:147835126-147931933	14.13	9.8625	-0.359562	0.0141788	processed_transcript
RP11-325P15.1	chr1:146490894-146596107	23.5178	16.2481	-0.369781	0.00314239	pseudogene
RP11-337C18.5	chr1:146649691-146651201	1470.14	615.913	-0.870006	0	pseudogene
RP11-495P10.1	chr1:147835126-147931933	2.6626	10.0688	1.33014	0.000435461	processed_transcript
